1 **The tendon interfascicular basement membrane provides a vascular niche for CD146<sup>+</sup>**  
2 **pericyte cell subpopulations**

3 Neil Marr<sup>1\*</sup>, Danae E. Zamboulis<sup>1</sup>, Dirk Werling<sup>2</sup>, Alessandro A. Felder<sup>3</sup>, Jayesh Dudhia<sup>4</sup>,  
4 Andrew A. Pitsillides<sup>1</sup>, Chavaunne T. Thorpe<sup>1</sup>

5 <sup>1</sup> Comparative Biomedical Sciences, Royal Veterinary College, Royal College Street, London  
6 NW1 0TU, UK

7 <sup>2</sup> Pathobiology and Population Sciences, Centre for Vaccinology and Regenerative Medicine,  
8 Royal Veterinary College, Hawkshead Lane, Hatfield AL9 7TA, UK

9 <sup>3</sup> Research Software Development Group, Advanced Research Computing, University College  
10 London, London WC1E 6AE, UK

11 <sup>4</sup> Clinical Sciences and Services, Royal Veterinary College, Hawkshead Lane, Hatfield AL9  
12 7TA, UK

13 \* Correspondence: [nmarr@rvc.ac.uk](mailto:nmarr@rvc.ac.uk)

14 **Abstract:** The interfascicular matrix (IFM) is critical to the mechanical adaptations and re-  
15 sponse to load in energy-storing tendons, such as the human Achilles and equine superficial  
16 digital flexor tendon (SDFT). We hypothesized that the IFM is a tendon progenitor cell niche  
17 housing an exclusive cell subpopulation. Immunolabelling of equine SDFT was used to iden-  
18 tify the IFM niche, localising expression patterns of CD31 (endothelial cells), CD146 (IFM  
19 cells) and LAMA4 (IFM basement membrane marker). Magnetic-activated cell sorting was  
20 employed to isolate and compare *in vitro* properties of CD146<sup>+</sup> and CD146<sup>-</sup> subpopulations.  
21 CD146 demarcated an exclusive interfascicular cell subpopulation that resides in proximity to  
22 a basal lamina which forms interconnected vascular networks. Isolated CD146<sup>+</sup> cells exhibited  
23 limited mineralization (osteogenesis) and lipid production (adipogenesis). This study demon-  
24 strates that the IFM is a unique tendon cell niche, containing a vascular-rich network of  
25 basement membrane, CD31<sup>+</sup> endothelial cells and CD146<sup>+</sup> cell populations that are likely es-  
26 sential to tendon structure- and/or function. Interfascicular CD146<sup>+</sup> subpopulations did not  
27 exhibit stem cell-like phenotypes and are more likely to represent a pericyte lineage. Previous  
28 work has shown that tendon CD146 cells migrate to sites of injury, therefore mobilisation of  
29 endogenous tendon IFM cell populations may promote intrinsic repair.

30 **Keywords:** tendon, interfascicular matrix, tendon progenitors, CD146, basement membrane.

## 31 **1. Introduction**

32 Tendons are fundamental components of the musculoskeletal system, acting as connec-  
33 tions between muscle and bone. The predominant function of tendon is to transfer the forces  
34 exerted by skeletal muscle contractions to bone, positioning the limb for locomotion [1,2].  
35 However, specialised energy-storing tendons, such as the equine superficial digital flexor  
36 tendon (SDFT) and human Achilles tendon, enhance the functional adaptation of tendon by  
37 lowering the energetic cost of locomotion through their mechanical properties, such as greater  
38 extensibility, elasticity and fatigue resistance [3-5]. Much like skeletal muscle, these special-  
39 ised mechanical properties of energy-storing tendons are provided by their hierarchical struc-  
40 ture of subunits predominantly composed of type I collagen, forming fascicles which are sur-  
41 rounded and bound by a non-collagenous interfascicular matrix (IFM) which governs the  
42 high-strain behaviour of energy-storing SDFT by facilitating sliding between fascicles [6].  
43 While the mechanical role of IFM in the function of energy storing tendons is well defined, less  
44 is known regarding its biological role in developing, adult and ageing tendon, particularly  
45 regarding the identity and function of IFM localised cell populations and their niche. Histo-  
46 logical analyses of tendon have revealed regional morphological differences in cell popula-  
47 tions, with rounder cells within the IFM, present in greater number compared to those within  
48 the fascicles which are highly aligned with the long axis of the tendon [7,8]. In addition,  
49 seminal studies have alluded to an endogenous tendon stem/progenitor cell (TSPC) population  
50 and niche, both of which remain largely undefined but have been speculated to reside within  
51 the IFM [9-11]. In other tissues, the stem cell niche is maintained by mechanically unique  
52 microenvironments, similar to the high shear environment within the IFM, which may there-  
53 fore be the location of the tendon stem/progenitor cell niche [12-14].

54 Tendon development is driven by stem/progenitor cell populations which express Mo-  
55 hawk homeobox (MKX) and Scleraxis (SCX) transcription factors [15-17], however their  
56 intracellular localisation impedes cell sorting techniques required for *in vitro* study of  
57 stem/progenitor cell populations. In adult tissues, cell surface markers, such as CD44 and  
58 CD90 (THY1), are members of a number of canonical marker panels routinely used in the  
59 characterisation and isolation of specific stromal/stem cell populations [18,19]. Recent studies  
60 have also reported resident CD146 populations in tendon [20,21]. CD146 or melanoma adhe-  
61 sion molecule (MCAM; MUC18; Gicerin; OMIM:155735) is a transmembrane glycoprotein  
62 belonging to the IgG superfamily of cell adhesion molecules [22]. Originally characterised as a  
63 marker of tumour progression and metastasis, CD146 has since been reported as a marker of

64 endothelial cell lineages, both haematopoietic and mesenchymal stem cell lineages, as well as  
65 synovial fibroblasts and periosteal cells [23-29]. Our laboratory has recently reported that these  
66 CD146 subpopulations are present within the IFM of the rat Achilles and recruited to injury  
67 sites from their IFM niche via the CD146 ligand Laminin  $\alpha$ 4 (LAMA4) [30]. However, few  
68 studies have attempted to comprehensively characterise CD146 tendon cells and their *in vivo*  
69 cell niche composition.

70 In this study, we tested the hypothesis that the IFM is a tendon progenitor cell niche  
71 housing an exclusive cell subpopulation. We report novel markers of interfascicular cells and  
72 basement membrane, and identify CD146 as an optimal marker for use in IFM cell sorting  
73 procedures. We also demonstrate that the lineage potential and clonogenicity of interfascicular  
74 CD146 cells is limited, which may be indicative of a differentiated vascular population in  
75 contrast to resident tendon stem/progenitor cells.

## 76 **2. Materials and Methods**

### 77 *2.1. Ethical statement*

78 The collection of animal tissues was approved by the Royal Veterinary College Ethics and  
79 Welfare Committee (URN-2016-1627b). All tissues were sourced from horses euthanised for  
80 reasons other than tendon injury at a commercial equine abattoir.

### 81 *2.2 Tissue acquisition*

82 Superficial digital flexor tendons (SDFT) were harvested from forelimbs taken from  
83 young, skeletally mature horses (age=3-8 years, n=5, exercise history unknown). Prior to iso-  
84 lation, the forelimbs were clipped to remove hair and the skin sterilised by several applications  
85 of 4% chlorhexidine (HiBiScrub®; Mölnlycke Health Care). Portions of mid-metacarpal  
86 SDFT (6-10 cm) were dissected free of the limb and stored immediately in standard growth  
87 medium consisting of pyruvate and low glucose Dulbecco's modified eagle medium (DMEM)  
88 supplemented with 1% (v/v) penicillin/streptomycin and 10% (v/v) qualified, heat-inactivated  
89 foetal bovine serum (FBS) until tissue processing (all from Gibco™). Excised tendons pre-  
90 senting with previously reported definitions of macroscopic evidence of injury were excluded  
91 from all experiments [31,32]. Dissections and subsequent cell processing were completed  
92 within 24 h of euthanasia.

### 93 *2.3 Cryosectioning*

94 SDFT frozen sections were prepared as previously described [33]. Tissues were briefly  
95 washed in Dulbecco's phosphate-buffered saline (calcium and magnesium free, embedded  
96 with optimal cutting temperature compound (OCT; Cell Path, Newtown, UK) embedding  
97 matrix and snap-frozen in pre-cooled hexane on dry ice. Serial longitudinal sections of 6-20  
98  $\mu\text{m}$  thickness were prepared using a cryostat microtome (OTF5000, Bright Instruments)  
99 equipped with MX35 Premier Disposable Low-Profile Microtome Blades (3052835, Fisher  
100 Scientific). Tissue sections were mounted on SuperFrost™ Plus Slides (10149870, Fisher  
101 Scientific), air-dried at room temperature (RT) for a maximum of 2 h and stored at  $-80\text{ }^{\circ}\text{C}$ .

#### 102 *2.4 Periodic acid-Schiff staining*

103 Periodic acid-Schiff (PAS) staining was used to detect mucins and basement membrane  
104 proteins. Staining was performed using an Alcian Blue (pH 2.5)/PAS staining kit according to  
105 manufacturer guidelines (Atomic Scientific). SDFT cryosections ( $20\text{ }\mu\text{m}$ ) were thawed and  
106 fixed with 4% PFA/10% NBF for 10 mins at RT. Slides were rinsed thoroughly with distilled  
107 water, stained with 1% Alcian blue in 3% acetic acid (pH 2.5) for 10 mins, and washed thor-  
108 oughly in distilled water. Slides were treated with 1% periodic acid solution for 10 minutes at  
109 RT, washed with distilled water, then treated with Schiff reagent (Feulgen) for 10 minutes at  
110 RT. Sections were then washed under running tap water until sections presented a magenta  
111 colour macroscopically. Sections were then counter-stained with haematoxylin, dehydrated  
112 and cleared using an automated slide stainer (Varistain™ Gemini ES), and mounted with glass  
113 coverslips using DPX mountant. Slides were cured at RT overnight and imaged using  
114 brightfield microscopy (DM4000B upright microscope) in Leica Application Suite software  
115 version 2.6 (Leica Microsystems).

#### 116 *2.5 Network-based predictions of CD146 interactions*

117 Proteins of interest for immunolabelling were selected based on their expression by tendon  
118 progenitor cell subpopulations in previous reports [21] and their predicted interactions in  
119 *Equus caballus* (NCBI taxid: 9796) using STRING (version 10.5) network-based predictions  
120 for CD146 and LAMA4 [20,34].

#### 121 *2.6 Immunolabelling*

122 SDFT cryosections were thawed and fixed with acetone (pre-cooled at  $-20\text{ }^{\circ}\text{C}$ ) for 10 mins,  
123 washed three times for 5 mins at RT with tris-buffered saline (TBS), incubated in 'blocking'  
124 buffer (TBS supplemented with 1% (w/v) bovine serum albumin (Scientific Laboratory Sup-

125 plies), 5% (v/v) goat serum (Sigma), and 5% (v/v) horse serum (Sigma) for 2 hours. Horse  
126 serum was used to saturate Fc receptors on the surface of cells within the tissue.

127 Sections were incubated with primary antibodies overnight at 4 °C (details regarding  
128 primary and secondary antibodies are provided in **Table S1**). For negative controls, sections  
129 were treated with blocking buffer only. For isotype controls, sections were treated with mouse  
130 and rabbit IgG isotype-matched controls diluted in blocking buffer at identical concentration to  
131 primary antibodies used.

132 For fluorescent detection (10 µm sections), secondary antibodies diluted in blocking  
133 buffer were applied to sections and incubated for 1 h at RT under dark conditions. Sections  
134 were washed with three times with TBS for 5 mins, and mounted with glass coverslips using  
135 ProLong™ Diamond antifade mountant with 4',6-diamidino-2-phenylindole (DAPI) as a nuclei  
136 counterstain. Slides were cured for 24 h at RT under dark conditions, prior to imaging. Nega-  
137 tive and isotype matched control images for fluorescent labelling are provided in **Figure S1**.

138 Immunohistochemical labelling (6 µm sections) was performed in a similar manner to  
139 fluorescent detection, using an EnVision®<sup>+</sup> Dual Link System-HRP DAB<sup>+</sup> system (Dako),  
140 with the inclusion of an of EnVision dual endogenous enzyme block for 15 mins at RT under  
141 dark conditions prior to treatment with blocking buffer, and wash steps were performed using  
142 0.05% (v/v) TBS-TWEEN20. For immunohistochemical detection, sections were incubated in  
143 EnVision peroxidase labelled polymer (conjugated to goat anti-mouse and goat anti-rabbit  
144 immunoglobulins) for 30 mins at RT. Sections were then washed three times and incubated  
145 with EnVision DAB<sup>+</sup> substrate buffer-3,3'-diaminobenzidine (DAB) chromogen solution for 3  
146 mins, rinsed three times with deionised water (diH<sub>2</sub>O), counter-stained using haematoxylin  
147 according to Delafield, dehydrated and cleared using standard procedures on a Varistain™  
148 Gemini ES automated slide stainer, then finally mounted with glass coverslips using DPX  
149 mountant. Slides were cured at RT overnight and imaged using brightfield microscopy  
150 (DM4000B upright microscope) in Leica Application Suite software version 2.6 (Leica Mi-  
151 crosystems). Negative control images for immunohistochemistry are provided in **Figure S2**.

## 152 *2.7 Fluorescent labelling analyses*

153 To distinguish between regions of IFM and fascicular matrix (FM), boundaries between  
154 both phases were determined by light refraction in phase contrast images, as well as gross  
155 identification by nuclei number and cell morphology (**Figure S3**).

156 For quantification, all settings remained constant between samples including exposure,  
157 pixel size, z-step size, and laser settings with all images taken in one single session. For each

158 sample, two distinct areas were imaged in two separate serial tissue sections (2× sections per  
159 horse donor, n=5).

160 Confocal images are presented as maximum intensity projections from z-stacks containing  
161 image slices at a resolution of  $512 \times 512 \times 40$  pixels ( $227.9 \times 227.9 \times 13.09 \mu\text{m}$ ;  $0.34 \mu\text{m}$  z-step  
162 size) to fully capture tissue depths. Image processing and analysis was performed using Fi-  
163 ji/ImageJ software [35]. For IFM measurements, an area fraction (%) of positively stained  
164 pixels were recorded in 8-bit binary images (black = negative, white = positive) to measure  
165 expression of markers of interest. To generate binary images for each marker, a background  
166 correction was performed to remove noise, followed by a median filter and threshold (Triangle  
167 for CD146/MKX = 555 nm, Huang for CD44/CD90 = 633 nm). The lookup table (LUT) of  
168 colour channels within images was changed for visualisation purposes.

### 169 *2.8 3D immunolabelling*

170 3D immunolabelling of SDFT segments was performed as previously described [36]. All  
171 steps were performed with orbital agitation. SDFT segments ( $5 \text{ mm} \times 5 \text{ mm} \times 2 \text{ mm}$ )  
172 were washed twice for 12 h with TBS at RT, and permeabilised sequentially in 50% (v/v)  
173 methanol:TBS, 80% (v/v) methanol:diH<sub>2</sub>O, and 100% methanol for 2 h at 4 °C. Samples were  
174 washed sequentially for 40 minutes at 4 °C with 20% (v/v) DMSO:methanol, 80% (v/v)  
175 methanol:diH<sub>2</sub>O, 50% (v/v) methanol:TBS, TBS, and TBS supplemented with 0.2% (v/v)  
176 Triton X-100. Prior to blocking, samples were incubated with a pre-blocking penetration buffer  
177 containing 0.2% TBS-TX100, 0.3 M glycine, and 20% DMSO for 6 h at 37 °C. Equine SDFT  
178 segments were blocked for 80 h at 37 °C in 0.2% TBS-TX100 supplemented with 6% (v/v)  
179 goat and 6% (v/v) donkey serum and 10% (v/v) DMSO. Primary antibody incubations for  
180 CD146 (1:100) were performed at 37 °C for 80 h in wash buffer (TBS supplemented with 0.2%  
181 (v/v) TWEEN20), 3% (v/v) goat serum, 3% (v/v) donkey serum, and 5% (v/v) DMSO. Seg-  
182 ments were washed 3× 2 h with wash buffer, incubated with secondary antibodies (1:250, goat  
183 anti-rabbit Alexa Fluor® 594) for 36 h at 37 °C, washed 5× 5 mins with wash buffer, and  
184 counterstained overnight with DAPI (1:2000) diluted in wash buffer. Segments were dehy-  
185 drated with increasing concentration of methanol, and tissue cleared with immersion in  
186 Visikol® HISTO™-1 for 36 h, followed by immersion in HISTO™-2 for at least 36 h at RT.  
187 Samples were stored in HISTO™-2 at 4 °C prior to confocal imaging.

188 Confocal imaging of regions (approx.  $1 \text{ mm} \times 1 \text{ mm} \times 0.2 \text{ mm}$ ) within each  
189 sample was performed using a Leica TCS SP8 laser scanning confocal microscope with a  
190 motorised stage. Our previous studies have established antibody penetration of at least 0.2 mm

191 in SDFT segments [37]. Images were captured using lasers emitting light at 405 (blue channel;  
192 DAPI) and 561 (red channel; Alexa Fluor 594) nm with laser power  $< 10\%$  and scanning  
193 speed =  $600 \mu\text{Hz}$  with a HC PL FLUOTAR 10x/0.32 dry objective lens, resolution =  
194  $1024 \mu \times 1024 \text{ px}$ , pinhole size = 1 Airy unit, frame average = 1, line average = 8, and elec-  
195 tronic zoom = 0.75. 3D renderings were captured in Leica LAS X software (version 3.5.5)  
196 within the 3D module.

### 197 2.9. Primary tendon cell culture

198 SDFTs collected under sterile conditions were placed in Petri dishes containing Gibco™  
199 Dulbecco's PBS (without phenol red, calcium and magnesium) supplemented with 1% (v/v)  
200 antibiotic-antimycotic solution. Surrounding peritenon was removed to isolate the tendon core  
201 (6 g), which was diced into approximately  $4 \text{ mm}^3$  pieces, rinsed with DPBS, and digested with  
202 1 mg/mL pronase E (39052, VWR) per 1 g tissue for 6-8 h at  $37^\circ\text{C}$  and 5%  $\text{CO}_2$  under constant  
203 agitation. Following pronase digestion, tissue was digested for a further 24 h with 0.5 mg/mL  
204 collagenase type IV (CLS-4, Lorne Laboratories) and 1 mg/mL dispase II (17105041, Invi-  
205 trogen) at  $37^\circ\text{C}$  and 5%  $\text{CO}_2$  with constant agitation [38].

### 206 2.10. Magnet-activated cell sorting (MACS) of CD146 cells

207 Previous studies have shown that  $>50\%$  expression of cell membrane proteins can be re-  
208 stored post-digestion by 24 h *in vitro* culture [39]. Hence, to enhance antigen recovery, freshly  
209 digested tendon-derived cells (TDCs) were cultured overnight to maximise CD146 cell isola-  
210 tions. Following this recovery phase, adherent cells were dissociated at  $37^\circ\text{C}$  for 10 mins using  
211 Accutase® solution according to manufacturer's guidelines. Cells remaining in suspension  
212 (i.e. non-adherent populations) were also collected alongside dissociated cells (adherent pop-  
213 ulations). Cell isolates were washed by resuspension in fresh growth medium and centrifuged  
214 at  $300 \times g$  for 10-20 mins depending on pellet formation. Cell pellets (passage 1; p1) were  
215 resuspended in growth medium and separated into single-cell suspensions (SCSs) by passing  
216 through a  $70 \mu\text{m}$  cell strainer. SCSs were resuspended in freshly prepared, ice-cold MACS  
217 buffer containing sterile-filtered FACSFlow™ (342003, BD Biosciences) supplemented with  
218 1% (w/v) BSA. SCSs were centrifuged for 10 mins at  $300 \times g$ , resuspended in MACS buffer,  
219 and both cell viability and numbers determined by trypan blue (T8154, Sigma-Aldrich) and a  
220 haemocytometer. Suspensions with  $<90\%$  viability were discarded. SCSs were incubated with  
221 anti-CD146 antibodies (ab75769, Abcam, Cambridge, UK) at a concentration of  $1 \mu\text{g/mL}$  for  
222 30 mins at  $4^\circ\text{C}$  on ice.

223 Following primary antibody incubation, SCSs were washed three times by centrifugation  
224 at  $300 \times g$ , resuspended in MACS buffer, and incubated with anti-rabbit IgG micro-beads  
225 (130-048-602, Miltenyi biotec) diluted in MACS buffer for 15 mins at  $4^\circ\text{C}$ . SCSs were washed  
226 three times by centrifugation at  $300 \times g$  and resuspended in MACS buffer.

227 MidiMACS™ LS columns (130-042-401, Miltenyi biotec) were mounted to a  
228 MidiMACS™ Separator and multistand (130-042-301, Miltenyi biotec) and washed with  
229 MACS buffer according to manufacturer guidelines. MACS-ready SCSs were passed through  
230 MidiMACS™ columns and washed with MACS buffer twice. All wash elutions containing  
231 negatively selected cells (i.e. CD146<sup>-</sup> TDCs) were collected on ice until processing of  
232 sub-cultures. Following negative cell depletion, CD146<sup>+</sup> cells were collected by removing the  
233 MACS column from the MACS magnet and eluting the column with MACS buffer and a  
234 plunger.

235 All sub-cultures were maintained until a maximum of three passages (p3) to limit phe-  
236 notypic drift. For downstream assays, cells were dissociated using Accutase® solution (A6964,  
237 Sigma-Aldrich).

### 238 *2.11. Flow cytometry*

239 For direct flow cytometry,  $0.1\text{-}0.2 \times 10^6$  cells were resuspended in DPBS. For CD146<sup>+</sup>  
240 cells, lower concentrations were used according to yields following MACS isolation. All tubes  
241 were stored on ice immediately prior to and during flow cytometry. Cell suspensions (50  $\mu\text{L}$ )  
242 were incubated with a phycoerythrin (PE)-conjugated variant of the EPR3208 anti-CD146  
243 antibody (1:100, ab209298, Abcam, Cambridge, UK) on ice for 30 mins, washed with DPBS  
244 and spun at  $400 \times g$ . Supernatant was removed, and pellets resuspended in 500  $\mu\text{L}$  DPBS for  
245 immediate flow cytometry analyses.

246 All flow cytometry acquisition was performed using an air-cooled 3-laser BD FACSCanto  
247 II™ flow cytometer (BD Biosciences) equipped with BD FACSDiva (version 8.0.1, BD Bio-  
248 sciences). Acquisition equipment and software were calibrated daily or immediately prior to  
249 acquisition using BD FACSDiva™ CS&T Research Beads (BD Biosciences). Data analyses  
250 was performed in FlowJo software (version 10, FlowJo LLC). Unstained controls (fluores-  
251 cence minus one control) were used to gate and discriminate positively and negatively labelled  
252 populations. The percentage of positive cells gated in unstained samples (i.e. autofluorescent  
253 cells) was subtracted from stained samples (i.e. experimental cells) to give an overall per-  
254 centage of immunoreactivity. All experiments recorded a minimum of 10,000 total events (i.e.  
255 cells).



## 256 2.12. Immunocytochemistry

257 For detection of CD146 in unsorted TDCs,  $0.1-0.2 \times 10^6$  cells were seeded on sterile 16 mm  
258 borosilicate glass circle coverslips coated with poly-L-lysine solution (0.01%, sterile-filtered,  
259 P4832, Sigma-Aldrich) until 70-80% confluence. To detect CD146 within MACS-enriched  
260 CD146<sup>+</sup> cells, immunocytochemistry was performed directly on cells ( $0.1-0.2 \times 10^6$  seeding  
261 density) in non-coated culture vessels at 70-80% confluence. Cells were washed 3 times with  
262 DPBS, fixed with pre-chilled (-20 °C) acetone:methanol (1:1) for 20 mins on ice, then washed  
263 three times with DPBS. Cells were blocked for 1 h with blocking buffer as described above.  
264 Cells were incubated overnight with primary antibodies overnight at 4 °C as described above,  
265 washed three times with DPBS, incubated for 1 h with secondary antibodies (1:500, goat an-  
266 ti-rabbit Alexa Fluor® 488 and goat anti-mouse Alexa Fluor® 594).

267 For direct CD146 labelling in MACS-sorted populations, cells were incubated overnight at  
268 4 °C with phycoerythrin (PE)-conjugated anti-CD146 antibodies (1:100, ab209298, Abcam,  
269 Cambridge, UK). Cells were washed three times with DPBS, labelled with DAPI (1 µg/mL) for  
270 2 mins, washed three times with DPBS and mounted using Prolong™ Diamond, cured at RT  
271 under dark conditions for 24 h before storing at 4 °C until imaging. Fluorescent imaging of  
272 TDCs was performed using a Leica SP5 (40× HCX PL FLUOTAR PH2 NA=0.75 objective).  
273 For CD146<sup>+</sup> cells, imaging was performed on a DMIRB inverted microscope (Leica Mi-  
274 crosystems, Wetzlar, Germany; 40× N PLAN L corr PH2 NA=0.55 objective).

## 275 2.13. Clonogenic assay

276 Bone marrow-derived mesenchymal stromal cells (MSCs) isolated as described previ-  
277 ously were kindly provided by Dr Giulia Sivelli [10]. MSCs, unsorted TDCs, CD146<sup>-</sup> cells and  
278 CD146<sup>+</sup> cells were seeded in 6-well plates at a density of 100 cells cm<sup>-3</sup> (approx. 900 cells) and  
279 cultured for 7 d. At termination of cultures, cells were washed 3× with DPBS, fixed with 2.5%  
280 glutaraldehyde for 10 mins, then washed 3× DBPS (all steps at RT). Cells were stained with  
281 0.1% (v/v) crystal violet for 30 mins at RT. Cells were washed 3x with DBPS and left to air dry  
282 at RT. Images were acquired using a flat-bed scanner (Epson Perfection 4990, Epson) at a  
283 resolution of 800 dpi.

## 284 2.14. Adipogenesis assay

285 MSCs, unsorted TDCs, CD146<sup>-</sup> cells and CD146<sup>+</sup> cells were seeded into 12-well plates at  
286 a density of  $0.4 \times 10^5$  cells per well and cultured for 48 h until adherence in standard growth  
287 medium. To induce adipogenesis, standard growth media was removed, and cells were cultured

288 with StemPro® Adipogenesis differentiation media for a further 14 d. Cells were fed induction  
289 media every 72 h. Upon termination of culture, monolayers were washed once with DPBS  
290 before fixation with 4% PFA/10% NBF for 30 mins at RT.

291 To assess intracellular lipid vesicles produced by adipogenic conditions, cells were stained  
292 with Oil Red O. Fixed monolayers were rinsed once with distilled water then washed with 60%  
293 isopropanol for 5 mins at RT. Monolayers were stained for 15 mins at RT with a 3:2 working  
294 solution of 3-parts 0.3% (w/v) Oil Red O diluted in isopropanol and 1-part distilled water. Cells  
295 were washed repeatedly with distilled water until rinsed clear of precipitating Oil Red O, then  
296 counterstained with Harris haematoxylin for 1 min at RT.

297 Imaging was performed on an Axiovert 135TV inverted microscope (Zeiss) using Image  
298 Pro Insight version 9.1.4 (Media Cybernetics).

### 299 *2.15. Osteogenesis assay*

300 Following dissociation, MSCs, unsorted TDCs, CD146<sup>+</sup> and CD146<sup>-</sup> cells were seeded  
301 into 12-well plates a density of  $0.1 \times 10^6$  cells per well with osteogenic media containing 2 mM  
302 sodium phosphate dibasic (DiP) or standard growth medium as a control with each condition  
303 supplemented with 50 µg/mL ascorbic acid to promote collagen synthesis [40,41]. DiP (free  
304 phosphate donor) is essential for bone/mineralised extracellular matrix metabolism during  
305 osteogenesis [42]. Monolayers were fed with fresh half-media changes corresponding to each  
306 condition every 72 h.

307 Cell cultures were terminated after 21 days to assess mineralisation with Alizarin Red S  
308 staining [43]. Monolayers were rinsed once with DPBS then fixed for 10 mins at RT with 2.5%  
309 (v/v) glutaraldehyde. Fixed cells were rinsed once with DBPS then three times with 70%  
310 ethanol and air-dried at RT overnight. Dried monolayers were subsequently stained with 1%  
311 (w/v) Alizarin Red S in diH<sub>2</sub>O for 5 mins at RT, then washed three times with 50% ethanol and  
312 left to air-dry overnight. Imaging was performed as described above.

### 313 *2.16. Statistical analyses*

314 Statistical analyses and graphs were produced using GraphPad Prism (version 9.1).  
315 Normality tests were performed according to Shapiro-Wilk tests ( $\alpha=0.05$ ). All datasets passed  
316 normality tests and were analysed using unpaired two-tailed t-test (significance set to  $P < 0.05$ ).  
317 Graphs were plotted as mean ( $\mu$ )  $\pm$  standard deviation (SD).

## 318 **3. Results**

### 319 3.1 CD146 is a marker of interfascicular cell populations

320 PAS staining demonstrated that the IFM contains mucin-rich basement membrane. Using  
321 both CD146 and the IFM basement membrane marker LAMA4 in STRING predictions identified  
322 several potential interfascicular cell surface markers including CD44, CD90 (THY1) and  
323 CD133 (PROM1), as well as a broader network of interfascicular niche and basement mem-  
324 brane components, including dystroglycan 1 (DAG1), integrin subunit  $\beta$ 1 (ITGB1) and  
325 fibronectin 1 (FN1) amongst other potential proteins of interest (Fig. 1A-B).

326 To validate these proposed interfascicular cell markers, fluorescent labelling of CD44,  
327 CD90, CD146 and MKX was quantified in both fascicular and interfascicular regions (Fig.  
328 1C-J). All markers were enriched within IFM (72-94% positive expression) and had signifi-  
329 cantly less expression within fascicles, with fascicular CD146 expression less than 1% com-  
330 pared to CD44, CD90 and MKX which were between 4-15%.

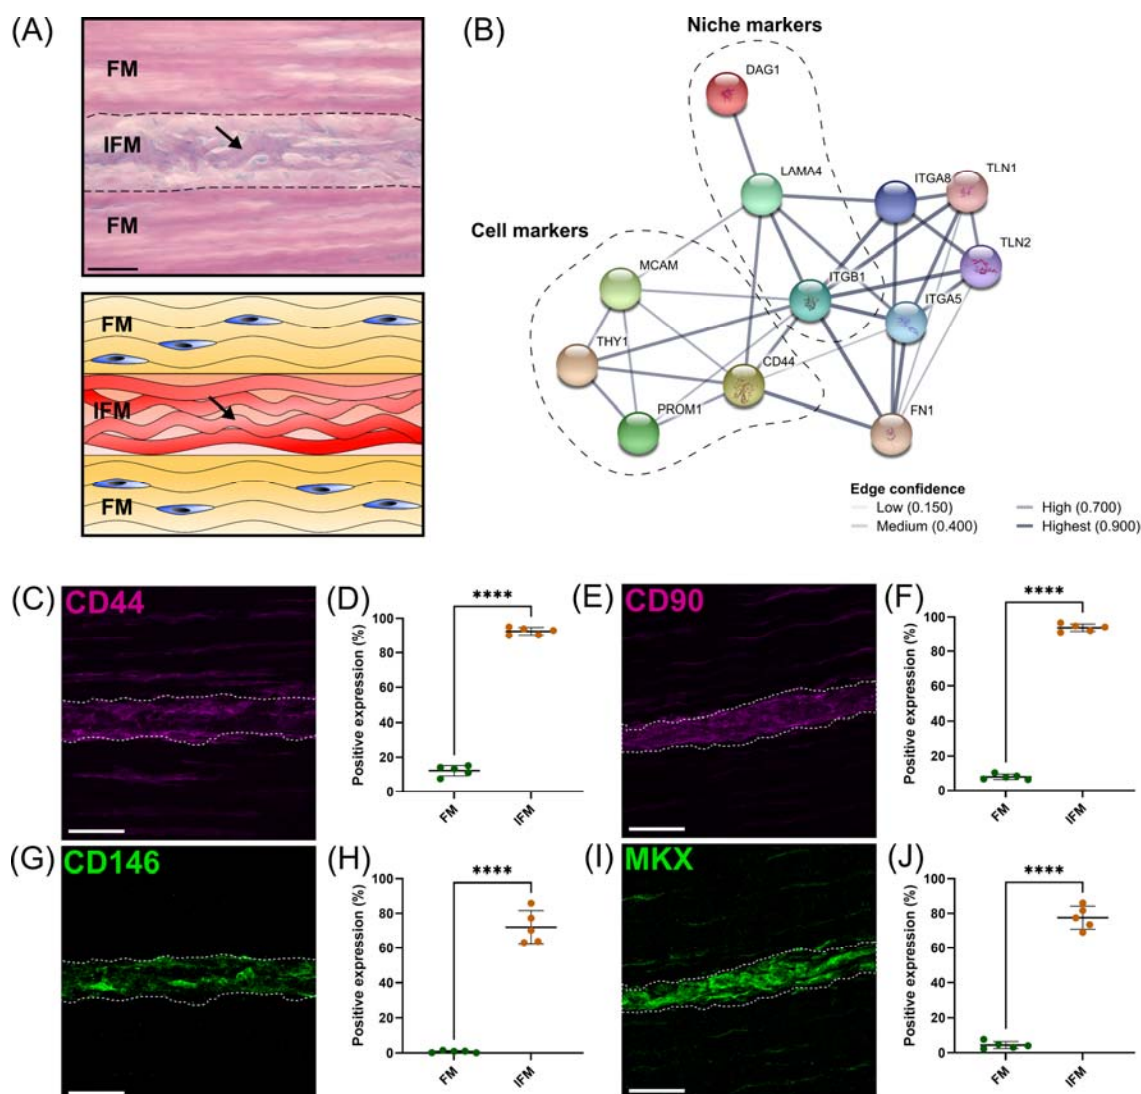

332 **Figure 1.** Analyses of regional differences in tendon cell marker expression demonstrated that  
333 CD146 is exclusively expressed by interfascicular cells within an interfascicular niche. (A)  
334 PAS-staining and schematic of SDFT sections highlighted mucin-rich basement membrane  
335 (arrow; purple) of vasculature (schematic; red) within the interfascicular matrix (IFM). Nuclei  
336 = blue. Scale bar = 50  $\mu$ m. (B) STRING-predicted protein-protein interactions revealed po-  
337 tential targets for novel tendon cell populations using validated interfascicular niche markers  
338 CD146 and LAMA4. Interactions based on CD146 (MCAM) and LAMA4 demonstrated a  
339 protein neighborhood consisting of cell markers CD44, CD90 (THY1), CD133 (PROM1), as  
340 well as cell niche components such as ITGB1, DAG1 and FN1. (C-J) Image analyses com-  
341 paring the positive labelling (area fraction; %) of longitudinal SDFT sections immunolabelled  
342 with CD44 (C,D), CD90 (E,F), CD146 (G,H) and MKX (I,J) in both fascicular matrix (FM)  
343 and IFM regions. The IFM is outlined by dotted lines. Scale bar = 50  $\mu$ m. Biological replicates  
344 (n) = 5 per tendon region. Technical replicates = 3-4 per individual sample. Graphs were  
345 plotted as mean ( $\mu$ )  $\pm$  SD. Statistical significance: \*\*\*\* ( $P \leq 0.0001$ ).

346 Using 3D imaging of SDFT labelled with CD146, we identified an interfascicular network  
347 of vascular structures within which CD146 cells were localised (Fig.2A). The colocalisation of  
348 CD146 with CD31 (endothelial marker) or LAMA4 (basement membrane) (fig 2 B-C) con-  
349 firmed that the structures were vascular.

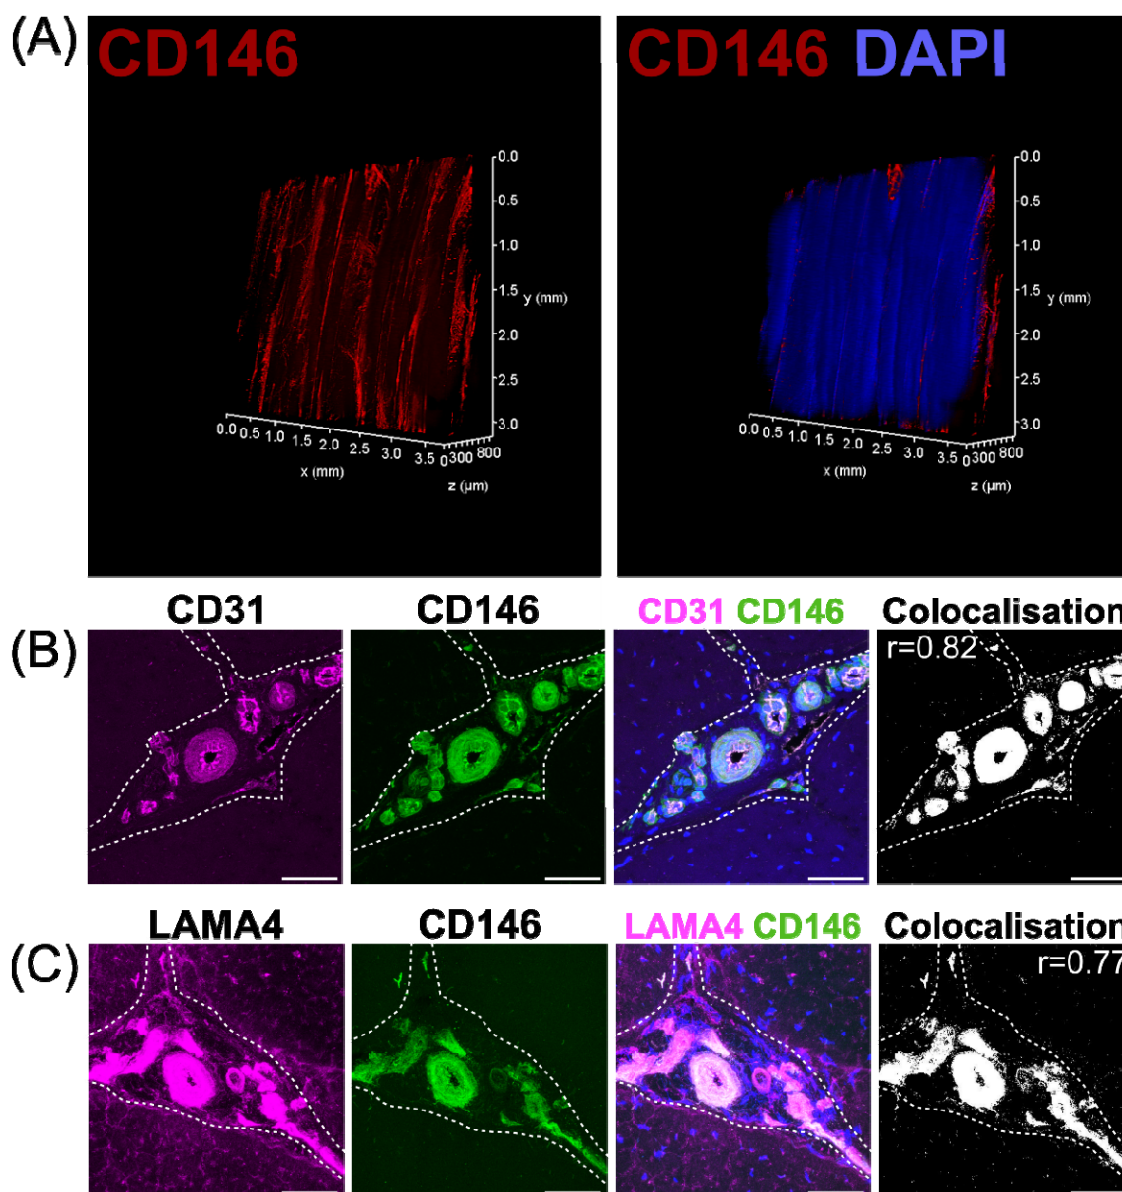

350

351 **Figure 2.** CD146 cell populations demarcated a vascular network indicative of a vascular cell  
352 niche within the interfascicular matrix. 3D imaging of CD146 (A) confirmed that the IFM was  
353 enriched with CD146 cell populations as part of an interconnected vessel network. Images of  
354 labelled transverse SDFT sections demonstrating colocalisation of CD31, CD146, and LA-  
355 MA4 (B,C), indicating that CD146 represents a marker of interfascicular vascular/endothelial  
356 cell populations resident within laminin-rich vessels. Nuclei = DAPI (blue). IFM is demarcated  
357 by dashed lines in transverse images. Scale bar = 50  $\mu\text{m}$ .

### 358 3.2 Tendon interfascicular matrix is enriched in an endothelial basement membrane

359 To identify and characterise the major components of interfascicular basement membrane,  
360 we performed immunolabelling of basement membrane proteins, including full-length laminin

361 (pan-laminin), type IV collagen, and Perlecan (Fig. 3A-C), all of which localised to the vas-  
362 culature within IFM. Further labelling with endothelial markers endomucin (EMCN) and von  
363 willebrand factor (VWF) demonstrated abundant expression within the IFM (Fig. 3D-E).  
364 STRING predictions in *Equus caballus* identified canonical basement membrane components  
365 integrin  $\beta 1$  (ITGB1) and dystroglycan 1 (DAG1), as part of the CD146-LAMA4 interaction  
366 network. Hence, we performed labelling of  $\alpha$ -dystroglycan (IIH6) and ITGB1 (Fig. 3F&H), in  
367 addition to network-predicted cell surface marker CD133 (Fig. 3G) with all three labelled  
368 abundantly within the IFM. As LAMA4/LAMA5 ratios are critical for basement membrane  
369 integrity [44], we also demonstrated labelling for laminin  $\alpha 5$  (LAMA5) within the IFM (Fig.  
370 3I). We also examined other reported angiogenic mediators, Netrin-1 (NTN1); a reported  
371 ligand of CD146, and Neuropilin-1 (NRP1), both of which also localised to the IFM (Fig.  
372 3J-K).

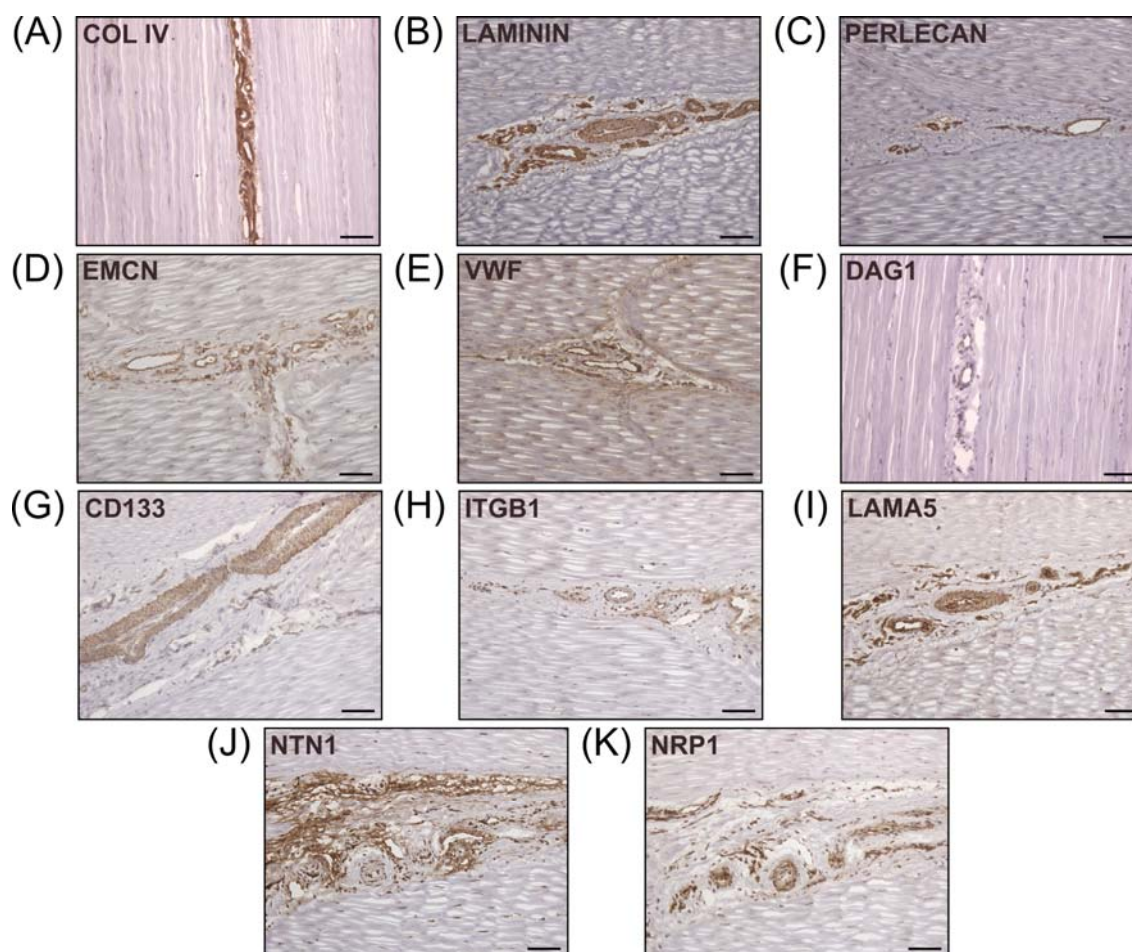

373

374 **Figure 3.** Canonical and network-predicted vascular basement membrane components were  
375 enriched within the interfascicular matrix. Experimental validation confirmed interfascicular

376 expression of Type IV collagen (A), full-length laminin (B), Perlecan (C), as well as vascular  
377 markers EMCN (D) and VWF (E). Immunolabelling validation also confirmed enrichment  
378 within interfascicular vasculature with network-predicted markers DAG1 (IIIH6; F), CD133  
379 (G), IGTB1 (H), laminin isoform LAMA5 (I), and angiogenic mediators NTN1 (J) and NRP1  
380 (K). Scale bar = 75  $\mu\text{m}$ .

### 381 3.3 Interfascicular CD146<sup>+</sup> cells are a rare subpopulation requiring enrichment for *in vitro* 382 isolation

383 Upon isolation from the SDFT, *in vitro* labelling of cell surface markers demonstrated that  
384 the majority of TDCs exhibited abundant CD44 and CD90 labelling and limited CD146 ex-  
385 pression (Fig. 4A-C). Reported TSPC marker Nestin (NES) was not detected in these *in vitro*  
386 cultures.

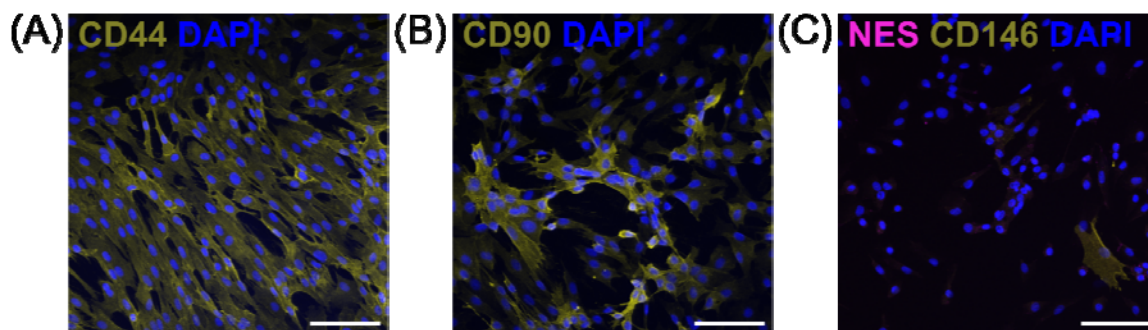

387  
388 **Figure 4.** Immunocytochemical labelling confirms CD146<sup>+</sup> cells are a rare subpopulation  
389 when expanded *in vitro*. Tendon cell-surface markers CD44 (A), CD90 (B) and CD146 (C)  
390 demonstrate that CD146 cells are a rare subpopulation amongst cultured TDCs when compared  
391 to cells expressing CD44 or CD90. No NES was detected in TDCs (passage 1). n=3 (biological  
392 replicates). Scale bar = 100  $\mu\text{m}$ .

393 To study CD146 cells *in vitro*, we developed a MACS procedure for the enrichment of  
394 CD146 cells. A single application of MACS enrichment was able to yield CD146 cells with  
395 purity of approximately 64% as determined by flow cytometry (Fig. 5A-C). Immunocyto-  
396 chemistry of positively sorted CD146 cells confirmed expression of CD146 in the majority of  
397 cells (Fig. 5D). Comparison of cell numbers pre and post MACS showed that approximately  
398 2% of unsorted cells were CD146 positive (Fig. 5E), providing further emphasis on the rarity  
399 of CD146 cell subpopulations and requirements for optimal enrichment procedures. However,  
400 some CD146 positive cells were detected in negative fractions (approx. 14%) (Fig. 5F).

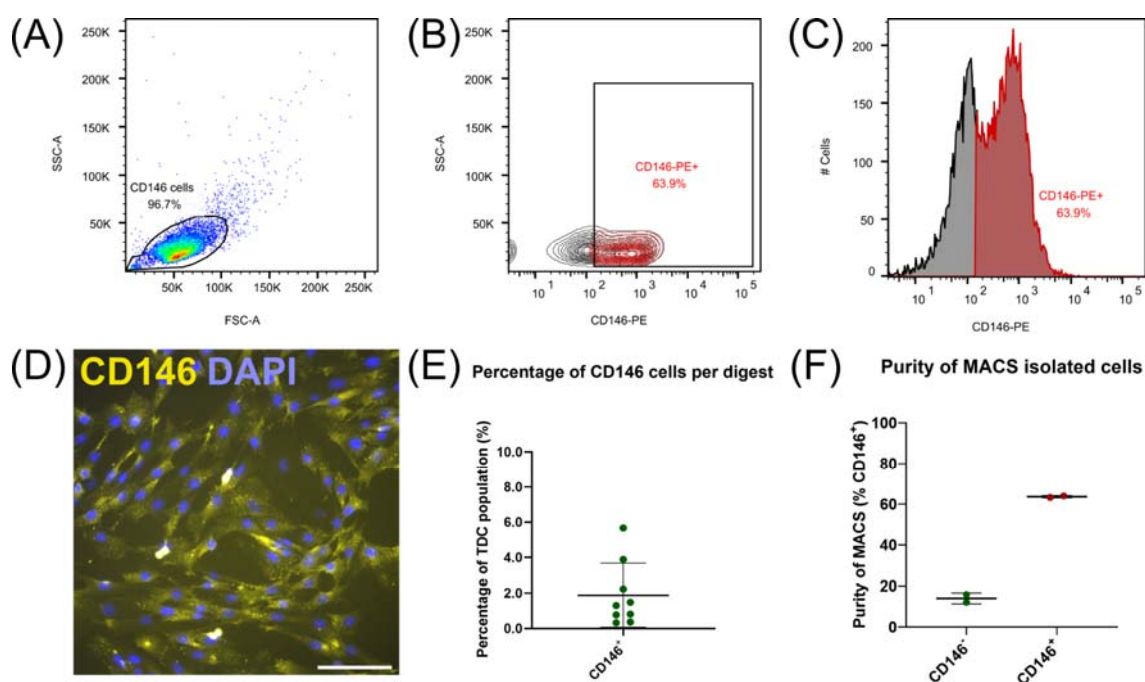

401

402 **Figure 5.** MACS yields good purity CD146<sup>+</sup> cell isolations which can be expanded *in vitro* for  
403 downstream analyses. Flow cytometry (A-C) confirmed CD146 expression in CD146<sup>+</sup> cell  
404 populations. Total events = 10,000. Immunocytochemically labelled CD146 cells (D; passage  
405 2) labelled with CD146 reaffirmed that expression persisted once expanded *in vitro*. n=3 (bi-  
406 ological replicates). Scale bar = 100  $\mu$ m. (E) The percentage of CD146 cells (approx. 2%)  
407 yields by MACS from the original tendon-derived cell suspensions as determined by cell  
408 counting, reiterated the rarity of CD146 cells. n=9 (biological replicates). Across MACS iso-  
409 lations (F), flow cytometry confirms CD146 purity, albeit approximately 15% of cells in the  
410 CD146<sup>-</sup> negative fraction were positive for CD146. n=2 (biological replicates) per cell fraction.  
411 Graphs were plotted as mean ( $\mu$ )  $\pm$  SD.

### 412 3.4 Interfascicular CD146 cells have limited differentiation potential

413 To assess their clonogenicity and multi-lineage potential, unsorted TDCs, CD146<sup>+</sup>,  
414 CD146<sup>-</sup> cells were subjected to clonogenic, osteogenic and adipogenic assays using MSCs as a  
415 positive control. CD146<sup>+</sup> cells showed no enhanced clonogenicity compared to  
416 CD146-negative cells or heterogenous TDCs (Fig. 6A-D). For adipogenesis, TDCs, CD146<sup>+</sup>  
417 and CD146<sup>-</sup> cells all showed limited adipogenic potential when stimulated (Fig. 6E-H). Under  
418 osteogenic conditions, unsorted TDCs displayed extensive calcium deposition with some  
419 mineralised nodules present, however virtually no calcium deposition nor mineralisation was  
420 detected in either CD146<sup>+</sup> and CD146<sup>-</sup> sorted cell populations (Fig. 6M-P).



421

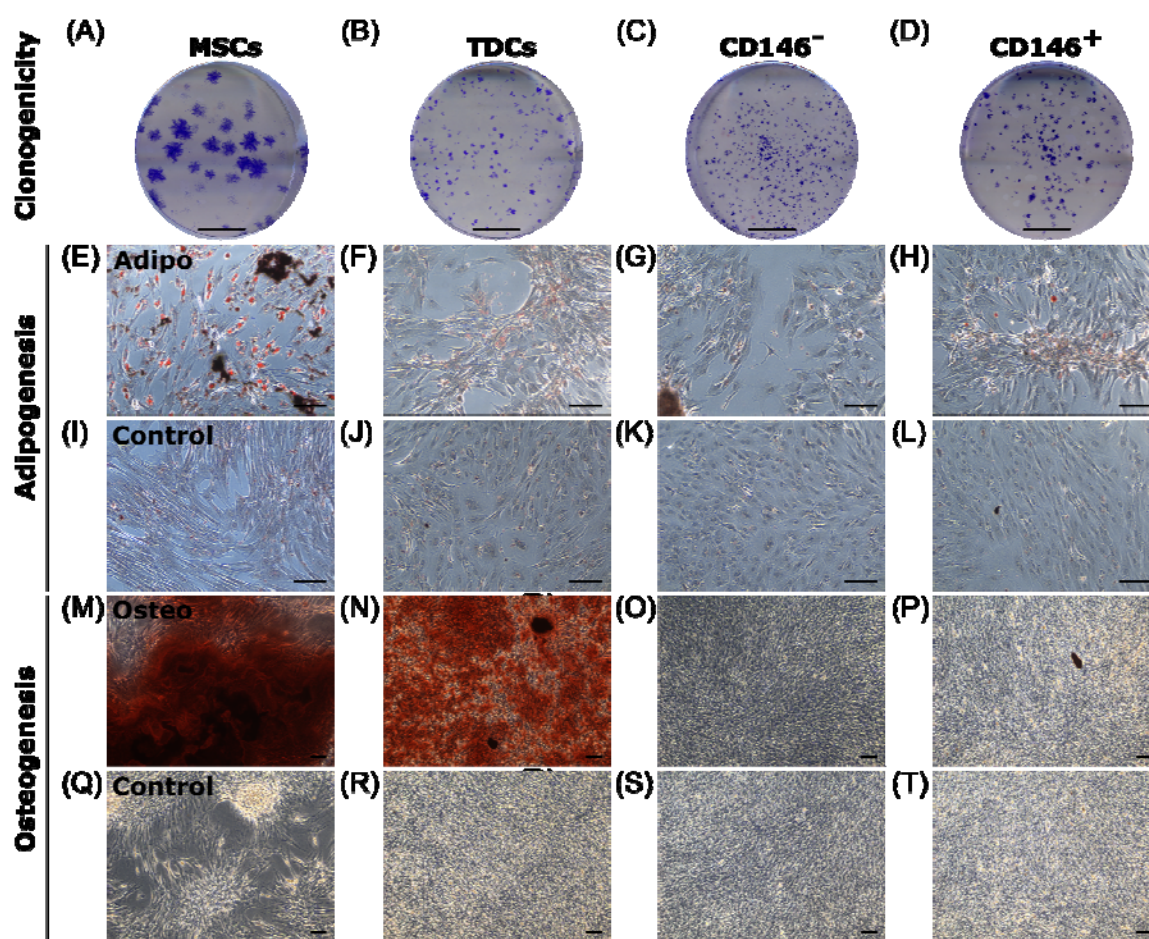

422

423 **Figure 6.** CD146<sup>+</sup> cells exhibit limited clonogenicity and lineage potential. Representative  
424 images of colonies formed by MSCs, TDCs, CD146<sup>-</sup> and CD146<sup>+</sup> populations (A-D). Scale bar  
425 = 1 cm. Oil Red O staining of MSCs, TDCs, CD146<sup>-</sup> and CD146<sup>+</sup> cells (E-L) under adipogenic  
426 conditions using StemPro® Adipogenesis differentiation media (E-H) and control conditions  
427 (I-L) demonstrate that TDCs, CD146<sup>+</sup> and CD146<sup>-</sup> cells produce a limited number of lipid  
428 vesicles. Lipid vesicles = red. n=3 per cell type (biological replicates). n=3 per condition  
429 (technical replicates). Scale bar = 100 μm. Alizarin Red S staining of MSCs, TDCs, CD146<sup>-</sup>  
430 and CD146<sup>+</sup> cells (M-T) under osteogenic conditions containing 2 mM DiP (M-P) and control  
431 conditions (Q-T) demonstrate that tendon cells exhibit limited mineralisation capacity when  
432 separated. Mineralised nodules = black. Calcium deposits = red. Unmineralised matrix = re-  
433 flective/white. n=3 for each cell type (biological replicates). n=2-3 wells for each condition  
434 (technical replicates). Scale bar = 100 μm.

435 **4. Discussion**

436 In this study, we have characterised CD146<sup>+</sup> cell populations and their niche within the  
437 tendon IFM. We demonstrate that CD146<sup>+</sup> cells exclusively localise to the IFM in healthy  
438 tendon and reside in a niche containing vascular basement membrane and vascular-associated  
439 proteins. In contrast to our hypothesis that the IFM is a progenitor cell niche, CD146<sup>+</sup> cells  
440 exhibited limited differentiation potential, indicating they are unlikely to be stem/progenitor  
441 cells, and may instead be of vascular origin.

442 Several studies have demonstrated the presence of CD146<sup>+</sup> cells in tendon; with recent  
443 single-cell RNA sequencing of human tendon revealing three cell populations that express  
444 CD146; one of which was an endothelial population which co-expressed CD31 [45]. Fur-  
445 thermore, in single-cell analyses of mouse tendon, CD146<sup>+</sup> tendon cells, identified as haema-  
446 topoietic cells, represented around 9% of TDCs [46]. In other tissues such as bone, CD31 and  
447 CD146 expression can be used to delineate endosteal and vascular populations which remodel  
448 the haematopoietic niche [47,48]. Previous research from our group has highlighted CD31 as  
449 an IFM-localised vascular marker [33] and the colocalisation of CD146 with CD31 we report  
450 here suggests that CD146<sup>+</sup> may be an IFM population of pericytes/endothelial cells. It is no-  
451 table that not all CD146<sup>+</sup> cells *in situ* were CD31<sup>+</sup>, suggesting that CD146 labels more than one  
452 cell population within the IFM, or that CD31 expression may be transient.

453 In addition, our recent studies have established that CD146<sup>+</sup> cells migrate to sites of injury  
454 in the rat Achilles tendon, which is accompanied by increased LAMA4 [30]. 3D imaging of  
455 tendon revealed an interconnected network of CD146 labelling within the IFM; structures  
456 which were similar those seen in 3D imaging of LAMA4 in SDFT [36]. The colocalisation of  
457 CD146 and LAMA4 in the current study further reinforces the putative ligand-receptor inter-  
458 action that CD146 and LAMA4 share, which has been demonstrated in previous studies  
459 [49,50]. In chondrocytes, blocking LAMA4 inhibited cluster formation, which is typical of  
460 pathological cartilage, and also resulted in downregulation of Claudin-1 (previously identified  
461 as a tendon IFM protein) and MMP3 [51,52]. Recent studies have already established that loss  
462 of LAMA4 results in reduced CD146 cell expression and loss of basement membrane/niche  
463 maintenance in both mesenchymal and haematopoietic environments [53]. Therefore, LAMA4  
464 may act as a homing receptor for migrating interfascicular CD146<sup>+</sup> tenocytes, however the  
465 chemokines that facilitate this are yet to be identified.

466 Here, we confirm that both LAMA4 and LAMA5 are abundant within the IFM niche,  
467 alongside other vascular components ITGB1, VWF, EMCN, NTN1 and NRP1. During de-  
468 velopment, no other laminin chain functionally compensates for the  $\alpha 4$ -chain when knocked  
469 out during angiogenesis, however upon postnatal maturation, a compensatory upregulation of

470 LAMA5 as a result of LAMA4 loss results in a milder vascular phenotype which suggests that  
471 the balance between laminin subunits LAMA4/LAMA5 ratios is critical for maintaining a  
472 healthy vascular network and vascular niche [54]. Given the abundance of LAMA4 and  
473 LAMA5, both chains and their full-length laminin isoforms 411 and 511 are likely essential to  
474 the IFM endothelial basement membrane due to their previously reported role in shear-stress  
475 response and mechanotransduction [55,56].

476 *In situ*, IFM cells were also positive for CD44 and CD90, which have been used as markers  
477 for putative stem/progenitor cell populations, both in tendon and other tissues, although their  
478 expression is likely acquired at later stages of differentiation and proliferation [57]. However,  
479 given that both markers were widely expressed throughout the IFM and fascicles, it is unlikely  
480 that these markers are specific for tendon stem cells in the equine SDFT and instead label  
481 several populations within tendon, including the tenocytes resident within fascicles. This is  
482 supported by single-cell RNA sequencing data from the mouse Achilles tendon showing that  
483 both CD44 and CD90 are expressed by tenocytes and other tendon cell populations [46].

484 The identification of multiple vascular structures using markers of endothelial/vascular  
485 cell lineages suggests the IFM houses a specialised vascular niche, rich in basement membrane  
486 proteins. This is supported by our previous proteomics data showing enrichment of basement  
487 membrane proteins in the IFM, including perlecan, laminins and collagen type IV [7]. The  
488 identification of perlecan-rich vascular networks in tendon IFM has major implications for the  
489 study of tendon. During development, perlecan is integral for tight packaging of interstitial  
490 tissues, which house vasculature, to ensure that maturation of endothelial tissues proceeds [58].  
491 In addition, lymphangiogenesis within interstitial tissues is defined by the expression of  
492 perlecan and interstitial fluid flow [59]. In tendons, fascicular sliding may therefore be integral  
493 to IFM lymphatic and vascular remodelling. Moreover, VWF is likely to act as an endothelial  
494 cell ligand within the interfascicular basement membrane. It is notable that several of the  
495 network predicted CD146 interactions are basement membrane components, and localise to the  
496 IFM, indicating tethering of CD146 cells to the basement membrane.

497 *In vitro*, tendon derived cells showed similar protein expression to that seen *in situ*, with  
498 abundant labelling of CD44 and CD90, and limited labelling for CD146, which was expressed  
499 by 2% of cells derived from the SDFT. This is somewhat lower than the 9% of cells in the  
500 mouse Achilles that expressed CD146 as determined by single cell sequencing [46]; this dis-  
501 crepancy may be explained by species-specific differences. The equine model is a highly rel-  
502 evant and well-accepted model for tendon research as the SDFT and human Achilles share  
503 similar function, structure and injury risk [60,61]. However, we did observe some spe-

504 cies-specific differences; for example, there was no detection of Nestin in equine TDCs, which  
505 is abundant in mice and human Achilles tendons, particularly in the IFM [21]. Another ex-  
506 planation for the discrepancy in population proportions in this study is the removal of the  
507 epitenon in the current study, which is known to house CD146<sup>+</sup> cells [36]. MACS was suc-  
508 cessfully employed to enrich CD146 populations, with approximately 65% of cells positive for  
509 CD146 post-sorting as determined by flow cytometry. This percentage is likely an un-  
510 der-representation, as CD146<sup>+</sup> cells were detected using flow cytometry immediately post  
511 MACS-enrichment, such that some CD146 antigens may still be bound to the magnetic label  
512 used during MACS, meaning they were not available for fluorescently tagged antibodies to  
513 bind to and so were not detected using flow cytometry. Indeed, immunocytochemistry of  
514 CD146<sup>+</sup> cells showed that virtually all cells labelled positively for CD146 post-MACS en-  
515 richment. However, a proportion of negatively selected cells were CD146<sup>+</sup> post-sorting, likely  
516 due to a small number of CD146<sup>+</sup> cells not binding to the column and therefore being eluted  
517 with the negative fraction. Purity could have been improved by additional rounds of sorting;  
518 however, this would have resulted in insufficient cell numbers for downstream experiments.

519 All cell populations exhibited similar clonogenic and limited differentiation potential,  
520 which agrees with previous studies that demonstrated equine SDFT-derived TSPCs have lim-  
521 ited differentiation potential [62]. Similarly, proliferation rates did not change significantly  
522 with cell types expanded under normoxic conditions, as reported in the same study. However,  
523 in the current study, lipid vesicles were produced in both adipogenic-induced TDCs and  
524 CD146<sup>+</sup> cells; in contrast to the above study where adipogenesis was not detected in stimulated  
525 TSPCs [62]. Unsorted tendon cell populations appear to have greater osteogenic potential  
526 compared to sorted CD146 populations. The increased mineralisation in TDCs as opposed to  
527 both sorted populations suggests that osteogenic capacity is increased when crosstalk between  
528 CD146<sup>+</sup> cells and CD146<sup>-</sup> is possible in culture. Given that CD146 is described as a marker of  
529 pericytes, co-culturing CD146 vascular cells with tenocytes may enhance their calcification  
530 potential further, as reported in atherosclerotic tissues which described greater mineralisation  
531 in zones of CD146-expressing pericytes [63]. We were unable to assess chondrogenesis due to  
532 limited cell numbers of CD146<sup>+</sup> cells after sorting, which were not sufficient for micromass  
533 survival during chondrogenic pellet induction. Taken together, CD146<sup>+</sup> cells do not exhibit  
534 stem cell plasticity and are likely a population of pericyte-like cells. While the multipotency of  
535 pericytes has been demonstrated in a range of species [64], other studies have shown that  
536 pericyte plasticity varies between tissue types, with some pericytes having limited differenti-  
537 ation potential [65]. It is possible that, while tendon pericytes have a limited multipotency, they

538 can differentiate down a tenogenic lineage, and indeed single cell sequencing data indicate that  
539 pericytes are a source of progenitor cells for adult tenocytes in murine tendon [66]. As tendon  
540 CD146<sup>+</sup> populations have been shown to migrate to sites of injury, establishing further un-  
541 derstanding of their local microenvironment, lineage origins, *in vitro* characteristics, and the  
542 effects of ageing will aid future research aimed at establishing if mobilising these populations  
543 can enhance intrinsic repair.

## 544 **5. Conclusions**

545 In tendon, CD146 demarcates an IFM-specific cell population that reside in a niche rich in  
546 basement membrane and vascular proteins. CD146<sup>+</sup> cells have limited clonogenicity and dif-  
547 ferentiation potential indicating they are unlikely to be stem/progenitor cells. Instead,  
548 co-localisation of CD146 with the vascular cell marker CD31 indicates these cells may be  
549 pericytes. As previous studies have shown that CD146 cells migrate to sites of injury, estab-  
550 lishing regenerative strategies that utilise endogenous tendon pericyte cell populations to  
551 promote intrinsic repair could act as a viable and effective method for improving healing re-  
552 sponses and preventing tendon re-injury.

553 **Supplementary Materials:** Table S1: Antibodies used for immunolabelling and their block-  
554 ing conditions; Figure S1: Negative and isotype control labelling of SDFT tissues; Figure S2:  
555 Negative (secondary antibody) control staining for immunohistochemical labelling of SDFT;  
556 Figure S3: Workflow for the determination of IFM and fascicular boundaries in longitudinal  
557 SDFT sections.

558 **Data Availability Statement:** Data is contained within the article or supplementary material.

559 **Author Contributions:** Conceptualization, NM, CTT; methodology, NM, AAF, DW, CTT;  
560 investigation, NM, DEZ; writing—original draft preparation, NM, CTT; writing—review and  
561 editing, NM, DEZ, AAF, DW, CTT, JD, AAP; supervision, CTT, JD, AAP; project admin-  
562 istration, CTT; funding acquisition, CTT. All authors have read and agreed to the published  
563 version of the manuscript.

564 **Funding:** This research was funded by Versus Arthritis (grant numbers 21216 and 22607).

565 **Institutional Review Board Statement:** Collection of equine tendon was approved prior to  
566 commencement of the study by the Royal Veterinary College Ethics and Welfare Committee  
567 (URN-2016-1627b).

568 **Acknowledgments:** The authors would like to thank Dr Isabel Orris and Dr Lucie Bourne for  
569 support and guidance on mineralization cultures.

570 **Conflicts of Interest:** The authors declare no conflict of interest.

## 571 **References**

1. 572 Alexander, R.M. Energy-saving mechanisms in walking and running. *J Exp Biol* **1991**, *160*,  
573 55-69, doi:10.1242/jeb.160.1.55.
2. 574 Benjamin, M.; Kaiser, E.; Milz, S. Structure-function relationships in tendons: a review. *J*  
575 *Anat* **2008**, *212*, 211-228, doi:10.1111/j.1469-7580.2008.00864.x.
3. 576 Alexander, R.M. Tendon elasticity and muscle function. *Comp Biochem Physiol A Mol Integr*  
577 *Physiol* **2002**, *133*, 1001-1011, doi:10.1016/s1095-6433(02)00143-5.
4. 578 Biewener, A.A. Muscle-tendon stresses and elastic energy storage during locomotion in the  
579 horse. *Comp Biochem Physiol B Biochem Mol Biol* **1998**, *120*, 73-87,  
580 doi:10.1016/s0305-0491(98)00024-8.
5. 581 Thorpe, C.T.; Godinho, M.S.C.; Riley, G.P.; Birch, H.L.; Clegg, P.D.; Screen, H.R.C. The  
582 interfascicular matrix enables fascicle sliding and recovery in tendon, and behaves more  
583 elastically in energy storing tendons. *J Mech Behav Biomed Mater* **2015**, *52*, 85-94,  
584 doi:10.1016/j.jmbbm.2015.04.009.
6. 585 Handsfield, G.G.; Slane, L.C.; Screen, H.R.C. Nomenclature of the tendon hierarchy: An  
586 overview of inconsistent terminology and a proposed size-based naming scheme with  
587 terminology for multi-muscle tendons. *J Biomech* **2016**, *49*, 3122-3124,  
588 doi:10.1016/j.jbiomech.2016.06.028.
7. 589 Thorpe, C.T.; Peffers, M.J.; Simpson, D.; Halliwell, E.; Screen, H.R.C.; Clegg, P.D.  
590 Anatomical heterogeneity of tendon: Fascicular and interfascicular tendon compartments  
591 have distinct proteomic composition. *Sci Rep* **2016**, *6*, 20455, doi:10.1038/srep20455.
8. 592 Thorpe, C.T.; Screen, H.R. Tendon Structure and Composition. *Adv Exp Med Biol* **2016**, *920*,  
593 3-10, doi:10.1007/978-3-319-33943-6\_1.

9. 594 Bi, Y.; Ehirchiou, D.; Kilts, T.M.; Inkson, C.A.; Embree, M.C.; Sonoyama, W.; Li, L.; Leet,  
595 A.I.; Seo, B.M.; Zhang, L.; et al. Identification of tendon stem/progenitor cells and the role of  
596 the extracellular matrix in their niche. *Nat Med* **2007**, *13*, 1219-1227, doi:10.1038/nm1630.
10. 597 Godwin, E.E.; Young, N.J.; Dudhia, J.; Beamish, I.C.; Smith, R.K. Implantation of bone  
598 marrow-derived mesenchymal stem cells demonstrates improved outcome in horses with  
599 overstrain injury of the superficial digital flexor tendon. *Equine Vet J* **2012**, *44*, 25-32,  
600 doi:10.1111/j.2042-3306.2011.00363.x.
11. 601 Richardson, L.E.; Dudhia, J.; Clegg, P.D.; Smith, R. Stem cells in veterinary  
602 medicine--attempts at regenerating equine tendon after injury. *Trends Biotechnol* **2007**, *25*,  
603 409-416, doi:10.1016/j.tibtech.2007.07.009.
12. 604 Smith, L.R.; Cho, S.; Discher, D.E. Stem Cell Differentiation is Regulated by Extracellular  
605 Matrix Mechanics. *Physiology* **2018**, *33*, 16-25, doi:10.1152/physiol.00026.2017.
13. 606 Evans, N.D.; Oreffo, R.O.C.; Healy, E.; Thurner, P.J.; Man, Y.H. Epithelial mechanobiology,  
607 skin wound healing, and the stem cell niche. *J Mech Behav Biomed Mater* **2013**, *28*, 397-409,  
608 doi:<https://doi.org/10.1016/j.jmbbm.2013.04.023>.
14. 609 Ivanovska, I.L.; Shin, J.-W.; Swift, J.; Discher, D.E. Stem cell mechanobiology: diverse  
610 lessons from bone marrow. *Trends in Cell Biology* **2015**, *25*, 523-532,  
611 doi:<https://doi.org/10.1016/j.tcb.2015.04.003>.
15. 612 Kimura, W.; Machii, M.; Xue, X.; Sultana, N.; Hikosaka, K.; Sharkar, M.T.K.; Uezato, T.;  
613 Matsuda, M.; Koseki, H.; Miura, N. *Irx11* mutant mice show reduced tendon differentiation  
614 and no patterning defects in musculoskeletal system development. *genesis* **2011**, *49*, 2-9,  
615 doi:<https://doi.org/10.1002/dvg.20688>.
16. 616 Anderson, D.M.; Arredondo, J.; Hahn, K.; Valente, G.; Martin, J.F.; Wilson-Rawls, J.; Rawls,  
617 A. Mohawkis a novel homeobox gene expressed in the developing mouse embryo.  
618 *Developmental Dynamics* **2006**, *235*, 792-801, doi:10.1002/dvdy.20671.
17. 619 Schweitzer, R.; Chyung, J.H.; Murtaugh, L.C.; Brent, A.E.; Rosen, V.; Olson, E.N.; Lassar,  
620 A.; Tabin, C.J. Analysis of the tendon cell fate using Scleraxis, a specific marker for tendons  
621 and ligaments. *Development* **2001**, *128*, 3855-3866, doi:10.1242/dev.128.19.3855.

- 18622 Morath, I.; Hartmann, T.N.; Orian-Rousseau, V. CD44: More than a mere stem cell marker.  
623 *The International Journal of Biochemistry & Cell Biology* **2016**, *81*, 166-173,  
624 doi:<https://doi.org/10.1016/j.biocel.2016.09.009>.
- 19625 Horwitz, E.M.; Le Blanc, K.; Dominici, M.; Mueller, I.; Slaper-Cortenbach, I.; Marini, F.C.;  
626 Deans, R.J.; Krause, D.S.; Keating, A. Clarification of the nomenclature for MSC: The  
627 International Society for Cellular Therapy position statement. *Cytotherapy* **2005**, *7*, 393-395,  
628 doi:10.1080/14653240500319234.
- 20629 Gumucio, J.P.; Schonk, M.M.; Kharaz, Y.A.; Comerford, E.; Mendias, C.L. Scleraxis is  
630 required for the growth of adult tendons in response to mechanical loading. *JCI Insight* **2020**,  
631 *5*, e138295, doi:10.1172/jci.insight.138295.
- 21632 Yin, Z.; Hu, J.J.; Yang, L.; Zheng, Z.F.; An, C.R.; Wu, B.B.; Zhang, C.; Shen, W.L.; Liu,  
633 H.H.; Chen, J.L.; et al. Single-cell analysis reveals a nestin(+) tendon stem/progenitor cell  
634 population with strong tenogenic potentiality. *Sci Adv* **2016**, *2*, e1600874,  
635 doi:10.1126/sciadv.1600874.
- 22636 Shih, I.M. The role of CD146 (Mel-CAM) in biology and pathology. *J Pathol* **1999**, *189*,  
637 4-11, doi:10.1002/(SICI)1096-9896(199909)189:1<4::AID-PATH332>3.0.CO;2-P.
- 23638 Johnson, J.P.; Rothbacher, U.; Sers, C. The progression associated antigen MUC18: a unique  
639 member of the immunoglobulin supergene family. *Melanoma Res* **1993**, *3*, 337-340,  
640 doi:10.1097/00008390-199310000-00006.
- 24641 Russell, K.C.; Phinney, D.G.; Lacey, M.R.; Barrilleaux, B.L.; Meyertholen, K.E.; O'Connor,  
642 K.C. In vitro high-capacity assay to quantify the clonal heterogeneity in trilineage potential of  
643 mesenchymal stem cells reveals a complex hierarchy of lineage commitment. *Stem Cells*  
644 **2010**, *28*, 788-798, doi:10.1002/stem.312.
- 25645 Schlagbauer-Wadl, H.; Jansen, B.; Muller, M.; Polterauer, P.; Wolff, K.; Eichler, H.G.;  
646 Pehamberger, H.; Konak, E.; Johnson, J.P. Influence of MUC18/MCAM/CD146 expression  
647 on human melanoma growth and metastasis in SCID mice. *Int J Cancer* **1999**, *81*, 951-955,  
648 doi:10.1002/(sici)1097-0215(19990611)81:6<951::aid-ijc18>3.0.co;2-v.



- 26649 Schrage, A.; Loddenkemper, C.; Erben, U.; Lauer, U.; Hausdorf, G.; Jungblut, P.R.; Johnson,  
650 J.; Knolle, P.A.; Zeitz, M.; Hamann, A.; et al. Murine CD146 is widely expressed on  
651 endothelial cells and is recognized by the monoclonal antibody ME-9F1. *Histochem Cell Biol*  
652 **2008**, *129*, 441-451, doi:10.1007/s00418-008-0379-x.
- 27653 Sers, C.; Kirsch, K.; Rothbacher, U.; Riethmuller, G.; Johnson, J.P. Genomic organization of  
654 the melanoma-associated glycoprotein MUC18: implications for the evolution of the  
655 immunoglobulin domains. *Proc Natl Acad Sci U S A* **1993**, *90*, 8514-8518,  
656 doi:10.1073/pnas.90.18.8514.
- 28657 Tormin, A.; Li, O.; Brune, J.C.; Walsh, S.; Schutz, B.; Ehinger, M.; Ditzel, N.; Kassem, M.;  
658 Scheduling, S. CD146 expression on primary nonhematopoietic bone marrow stem cells is  
659 correlated with in situ localization. *Blood* **2011**, *117*, 5067-5077,  
660 doi:10.1182/blood-2010-08-304287.
- 29661 Kaltz, N.; Ringe, J.; Holzwarth, C.; Charbord, P.; Niemeyer, M.; Jacobs, V.R.; Peschel, C.;  
662 Haupl, T.; Oostendorp, R.A. Novel markers of mesenchymal stem cells defined by  
663 genome-wide gene expression analysis of stromal cells from different sources. *Exp Cell Res*  
664 **2010**, *316*, 2609-2617, doi:10.1016/j.yexcr.2010.06.002.
- 30665 Marr, N.; Meeson, R.; Kelly, E.F.; Fang, Y.; Peffers, M.J.; Pitsillides, A.A.; Dudhia, J.;  
666 Thorpe, C.T. CD146 Delineates an Interfascicular Cell Sub-Population in Tendon That Is  
667 Recruited during Injury through Its Ligand Laminin-alpha4. *Int J Mol Sci* **2021**, *22*,  
668 doi:10.3390/ijms22189729.
- 31669 Dakin, S.G.; Werling, D.; Hibbert, A.; Abayasekara, D.R.; Young, N.J.; Smith, R.K.; Dudhia,  
670 J. Macrophage sub-populations and the lipoxin A4 receptor implicate active inflammation  
671 during equine tendon repair. *PLoS ONE* **2012**, *7*, e32333, doi:10.1371/journal.pone.0032333.
- 32672 Webbon, P.M. A post mortem study of equine digital flexor tendons. *Equine Vet J* **1977**, *9*,  
673 61-67, doi:10.1111/j.2042-3306.1977.tb03981.x.
- 33674 Godinho, M.S.C.; Thorpe, C.T.; Greenwald, S.E.; Screen, H.R.C. Elastin is Localised to the  
675 Interfascicular Matrix of Energy Storing Tendons and Becomes Increasingly Disorganised  
676 With Ageing. *Sci Rep* **2017**, *7*, 1-11, doi:ARTN 9713

10.1038/s41598-017-09995-4.

- 34678 Szklarczyk, D.; Morris, J.H.; Cook, H.; Kuhn, M.; Wyder, S.; Simonovic, M.; Santos, A.;  
679 Doncheva, N.T.; Roth, A.; Bork, P.; et al. The STRING database in 2017: quality-controlled  
680 protein-protein association networks, made broadly accessible. *Nucleic Acids Res* **2017**, *45*,  
681 D362-D368, doi:10.1093/nar/gkw937.
- 35682 Schindelin, J.; Arganda-Carreras, I.; Frise, E.; Kaynig, V.; Longair, M.; Pietzsch, T.;  
683 Preibisch, S.; Rueden, C.; Saalfeld, S.; Schmid, B.; et al. Fiji: an open-source platform for  
684 biological-image analysis. *Nat Methods* **2012**, *9*, 676-682, doi:10.1038/nmeth.2019.
- 36685 Marr, N.; Hopkinson, M.; Hibbert, A.P.; Pitsillides, A.A.; Thorpe, C.T. Bimodal  
686 Whole-Mount Imaging of Tendon Using Confocal Microscopy and X-ray Micro-Computed  
687 Tomography. *Biol Proced Online* **2020**, *22*, 13, doi:10.1186/s12575-020-00126-4.
- 37688 Marr, N.; Hopkinson, M.; Hibbert, A.P.; Pitsillides, A.A.; Thorpe, C.T. Bimodal  
689 Whole-Mount Imaging of Tendon Using Confocal Microscopy and X-ray Micro-Computed  
690 Tomography. *Biol Proc Online* **2020**, *22*, 13, doi:10.1186/s12575-020-00126-4.
- 38691 Garvican, E.R.; Salavati, M.; Smith, R.K.W.; Dudhia, J. Exposure of a tendon extracellular  
692 matrix to synovial fluid triggers endogenous and engrafted cell death: A mechanism for failed  
693 healing of intrathecal tendon injuries. *Connect Tissue Res* **2017**, *58*, 438-446,  
694 doi:10.1080/03008207.2016.1245726.
- 39695 Autengruber, A.; Gereke, M.; Hansen, G.; Hennig, C.; Bruder, D. Impact of enzymatic tissue  
696 disintegration on the level of surface molecule expression and immune cell function. *Eur J*  
697 *Microbiol Immunol (Bp)* **2012**, *2*, 112-120, doi:10.1556/EuJMI.2.2012.2.3.
- 40698 Barnes, M.J. Function of ascorbic acid in collagen metabolism. *Ann N Y Acad Sci* **1975**, *258*,  
699 264-277, doi:10.1111/j.1749-6632.1975.tb29287.x.
- 41700 Patel, J.J.; Bourne, L.E.; Davies, B.K.; Arnett, T.R.; MacRae, V.E.; Wheeler-Jones, C.P.D.;  
701 Orriss, I.R. Differing calcification processes in cultured vascular smooth muscle cells and  
702 osteoblasts. *Experimental Cell Research* **2019**, *380*, 100-113,  
703 doi:<https://doi.org/10.1016/j.yexcr.2019.04.020>.

- 42z04 Robey, P.G.; Termine, J.D. Human bone cells in vitro. *Calcif Tissue Int* **1985**, *37*, 453-460,  
705 doi:10.1007/BF02557826.
- 43z06 Taylor, S.E.; Shah, M.; Orriss, I.R. Generation of rodent and human osteoblasts. *Bonekey Rep*  
707 **2014**, *3*, 585, doi:10.1038/bonekey.2014.80.
- 44z08 Galatenko, V.V.; Maltseva, D.V.; Galatenko, A.V.; Rodin, S.; Tonevitsky, A.G. Cumulative  
709 prognostic power of laminin genes in colorectal cancer. *BMC Medical Genomics* **2018**, *11*,  
710 doi:10.1186/s12920-018-0332-3.
- 45z11 Kendal, A.R.; Layton, T.; Al-Mossawi, H.; Appleton, L.; Dakin, S.; Brown, R.; Loizou, C.;  
712 Rogers, M.; Sharp, R.; Carr, A. Multi-omic single cell analysis resolves novel stromal cell  
713 populations in healthy and diseased human tendon. *Sci Rep* **2020**, *10*,  
714 doi:10.1038/s41598-020-70786-5.
- 46z15 De Micheli, A.J.; Swanson, J.B.; Disser, N.P.; Martinez, L.M.; Walker, N.R.; Oliver, D.J.;  
716 Cosgrove, B.D.; Mendias, C.L. Single-cell transcriptomic analysis identifies extensive  
717 heterogeneity in the cellular composition of mouse Achilles tendons. *Am J Physiol Cell*  
718 *Physiol* **2020**, *319*, C885-C894, doi:10.1152/ajpcell.00372.2020.
- 47z19 Sacchetti, B.; Funari, A.; Michienzi, S.; Di Cesare, S.; Piersanti, S.; Saggio, I.; Tagliafico, E.;  
720 Ferrari, S.; Robey, P.G.; Riminucci, M.; et al. Self-Renewing Osteoprogenitors in Bone  
721 Marrow Sinusoids Can Organize a Hematopoietic Microenvironment. *Cell* **2007**, *131*,  
722 324-336, doi:10.1016/j.cell.2007.08.025.
- 48z23 Tormin, A.; Li, O.; Brune, J.C.; Walsh, S.; Schütz, B.; Ehinger, M.; Ditzel, N.; Kassem, M.;  
724 Scheduling, S. CD146 expression on primary nonhematopoietic bone marrow stem cells is  
725 correlated with in situ localization. *Blood* **2011**, *117*, 5067-5077,  
726 doi:10.1182/blood-2010-08-304287.
- 49z27 Ishikawa, T.; Wondimu, Z.; Oikawa, Y.; Gentilcore, G.; Kiessling, R.; Egyhazi Brage, S.;  
728 Hansson, J.; Patarroyo, M. Laminins 411 and 421 differentially promote tumor cell migration  
729 via  $\alpha 6 \beta 1$  integrin and MCAM (CD146). *Matrix Biology* **2014**, *38*, 69-83,  
730 doi:<https://doi.org/10.1016/j.matbio.2014.06.002>.

- 50z31 Wragg, J.W.; Finition, J.P.; Anderson, J.A.; Ferguson, H.J.M.; Porfiri, E.; Bhatt, R.I.; Murray,  
732 P.G.; Heath, V.L.; Bicknell, R. MCAM and LAMA4 Are Highly Enriched in Tumor Blood  
733 Vessels of Renal Cell Carcinoma and Predict Patient Outcome. *Cancer Research* **2016**, *76*,  
734 2314-2326, doi:10.1158/0008-5472.can-15-1364.
- 51z35 Fuerst, F.C.; Gruber, G.; Stradner, M.H.; Jones, J.C.; Kremser, M.L.; Angerer, H.; Setznagl,  
736 D.; Glehr, M.; Windhager, R.; Leithner, A.; et al. Regulation of MMP3 by laminin alpha 4 in  
737 human osteoarthritic cartilage. *Scand J Rheumatol* **2011**, *40*, 494-496,  
738 doi:10.3109/03009742.2011.605392.
- 52z39 Moazedi-Fuerst, F.C.; Gruber, G.; Stradner, M.H.; Guidolin, D.; Jones, J.C.; Bodo, K.;  
740 Wagner, K.; Peischler, D.; Krischan, V.; Weber, J.; et al. Effect of Laminin-A4 inhibition on  
741 cluster formation of human osteoarthritic chondrocytes. *J Orthop Res* **2016**, *34*, 419-426,  
742 doi:10.1002/jor.23036.
- 53z43 Cai, H.; Kondo, M.; Sandhow, L.; Xiao, P.; Johansson, A.-S.; Sasaki, T.; Zawacka-Pankau, J.;  
744 Tryggvason, K.; Ungerstedt, J.; Walfridsson, J.; et al. Critical role of *Lama4* for  
745 hematopoiesis regeneration and acute myeloid leukemia progression. *Blood* **2022**, *139*,  
746 3040-3057, doi:10.1182/blood.2021011510.
- 54z47 Thyboll, J.; Kortessmaa, J.; Cao, R.; Soininen, R.; Wang, L.; Iivanainen, A.; Sorokin, L.;  
748 Risling, M.; Cao, Y.; Tryggvason, K. Deletion of the laminin alpha4 chain leads to impaired  
749 microvessel maturation. *Mol Cell Biol* **2002**, *22*, 1194-1202,  
750 doi:10.1128/MCB.22.4.1194-1202.2002.
- 55z51 Di Russo, J.; Luik, A.L.; Yousif, L.; Budny, S.; Oberleithner, H.; Hofschroer, V.; Klingauf, J.;  
752 Bavel, E.; Bakker, E.N.; Hellstrand, P.; et al. Endothelial basement membrane laminin 511 is  
753 essential for shear stress response. *The EMBO Journal* **2017**, *36*, 183-201,  
754 doi:10.15252/emj.201694756.
- 56z55 Béguin, E.P.; Janssen, E.F.J.; Hoogenboezem, M.; Meijer, A.B.; Hoogendijk, A.J.; Van Den  
756 Biggelaar, M. Flow-induced Reorganization of Laminin-integrin Networks Within the  
757 Endothelial Basement Membrane Uncovered by Proteomics. *Molecular & Cellular*  
758 *Proteomics* **2020**, *19*, 1179-1192, doi:10.1074/mcp.ra120.001964.

- 57z59 Leonardi, E.A.; Xiao, M.; Murray, I.R.; Robinson, W.H.; Abrams, G.D. Tendon-Derived  
760 Progenitor Cells With Multilineage Potential Are Present Within Human Patellar Tendon.  
761 *Orthop J Sports Med* **2021**, *9*, 23259671211023452, doi:10.1177/23259671211023452.
- 58z62 Gustafsson, E.; Almonte-Becerril, M.; Bloch, W.; Costell, M. Perlecan maintains microvessel  
763 integrity in vivo and modulates their formation in vitro. *PLoS ONE* **2013**, *8*, e53715,  
764 doi:10.1371/journal.pone.0053715.
- 59z65 Rutkowski, J.M.; Boardman, K.C.; Swartz, M.A. Characterization of lymphangiogenesis in a  
766 model of adult skin regeneration. *Am J Physiol Heart Circ Physiol* **2006**, *291*, H1402-1410,  
767 doi:10.1152/ajpheart.00038.2006.
- 60z68 Patterson-Kane, J.C.; Rich, T. Achilles tendon injuries in elite athletes: lessons in  
769 pathophysiology from their equine counterparts. *ILAR J* **2014**, *55*, 86-99,  
770 doi:10.1093/ilar/ilu004.
- 61z71 Innes, J.F.; Clegg, P. Comparative rheumatology: what can be learnt from naturally occurring  
772 musculoskeletal disorders in domestic animals? *Rheumatology (Oxford)* **2010**, *49*, 1030-1039,  
773 doi:10.1093/rheumatology/kep465.
- 62z74 Williamson, K.A.; Lee, K.J.; Humphreys, W.J.; Comerford, E.J.; Clegg, P.D.; Canty-Laird,  
775 E.G. Restricted differentiation potential of progenitor cell populations obtained from the  
776 equine superficial digital flexor tendon (SDFT). *J Orthop Res* **2015**, *33*, 849-858,  
777 doi:10.1002/jor.22891.
- 63z78 Davaine, J.M.; Quillard, T.; Chatelais, M.; Guilbaud, F.; Brion, R.; Guyomarch, B.; Brennan,  
779 M.A.; Heymann, D.; Heymann, M.F.; Goueffic, Y. Bone Like Arterial Calcification in  
780 Femoral Atherosclerotic Lesions: Prevalence and Role of Osteoprotegerin and Pericytes. *Eur*  
781 *J Vasc Endovasc Surg* **2016**, *51*, 259-267, doi:10.1016/j.ejvs.2015.10.004.
- 64z82 Esteves, C.L.; Donadeu, F.X. Pericytes and their potential in regenerative medicine across  
783 species. *Cytometry Part A* **2018**, *93*, 50-59, doi:<https://doi.org/10.1002/cyto.a.23243>.
- 65z84 Herrmann, M.; Bara, J.J.; Sprecher, C.M.; Menzel, U.; Jalowiec, J.M.; Osinga, R.;  
785 Scherberich, A.; Alini, M.; Verrier, S. Pericyte plasticity - comparative investigation of the

786 angiogenic and multilineage potential of pericytes from different human tissues. *Eur Cell*  
787 *Mater* **2016**, *31*, 236-249, doi:10.22203/ecm.v031a16.

66788 De Micheli, A.J.; Swanson, J.B.; Disser, N.P.; Martinez, L.M.; Walker, N.R.; Oliver, D.J.;  
789 Cosgrove, B.D.; Mendias, C.L. Single-cell transcriptomic analysis identifies extensive  
790 heterogeneity in the cellular composition of mouse Achilles tendons. *American Journal of*  
791 *Physiology-Cell Physiology* **2020**, *319*, C885-C894, doi:10.1152/ajpcell.00372.2020.

792
